# Supplementary material
Source: bioRxiv or medRxiv preprint supplement (https://medrxiv.org/highwire/filestream/86984/field_highwire_adjunct_files/0/2020.06.21.20136465-1.pdf)
Supplement: Supplementary file [file 2020.06.21.20136465-1.pdf]

## Supplementary material

### Bayesian approach for modelling the dynamic of COVID-19 outbreak on the

### Diamond Princess Cruise Ship

Chao-Chih Lai, Chen-Yang Hsu, Hsiao-Hsuan Jen, Amy Ming-Fang Yen, Chang-Chuan Chan and

Hsiu-Hsi Chen

#### A. The collection of data on COVID-19 outbreak on the Diamond Princess Cruise Ship

#### B. Supplementary Tables

**S-Table 1.** Cases of COVID-19, number of subjects tested and number of asymptomatic cases associated with the Diamond Princess Cruise Ship.

**S-Table 2.** The predicted number of COVID-19 cases of Diamond Princess Cruise Ship passengers up to Mar. 7<sup>th</sup>, 2020 based on estimated results derived from data up to Feb. 19<sup>th</sup>, 2020 with the scenario of persistent transmission.

**S-Table 3.** Natural evolution of the compartment of susceptible (S), exposed (E), infectious (I), and removed (R) predicted by Bayesian ODE SEIR model using data on COVID-19 outbreak on the Diamond Princess Cruise Ship up to Feb. 19<sup>th</sup>, 2020.

**S-Table 4.** The predicted number of cumulative COVID-19 cases on the Diamond Princess Cruise Ship based on the scenario of complete containment measures applied on Feb. 14<sup>th</sup>, 2020.

## A. The collection of data on COVID-19 outbreak on the Diamond Princess Cruise Ship

The 14-day itinerary of Diamond Princess cruise ship was scheduled to depart from Yokohama on Jan. 20<sup>th</sup>, 2020. Among the total of 3711 persons on board, there were 2666 passengers and 1045 crews. Information on the itinerary and the number of passengers of the voyage of Diamond Princess was derived from the web-based interface of the Diamond Princess cruise ship (WHO, 2020; Princess Cruise Lines; Ministry of Health, Labor and Welfare, Japan, 2020; Wikipedia, 2020a; Wikipedia, 2020b). The first confirmed COVID-19 case in Diamond Princess cruise ship was reported by Hong Kong on Feb. 1<sup>st</sup>, 2020 (NIID, 2020a; Wikipedia, 2020a). Although the index case showed no symptoms during his stay in the cruise ship, he was admitted to a hospital in Hong Kong 6 days after his disembark on Jan. 25<sup>th</sup>, 2020, where the infection by SARS-CoV-2 was confirmed by laboratory test. The outbreak thus started with the introduction of the index case to the susceptible passengers of the cruise ship on his embark on Jan. 20<sup>th</sup>, 2020 (**Figure 2**).

The updated information on COVID-19 outbreak in Diamond Princess cruise ship during the quarantine period in Yokohama was provided by an official web site of Japan (2020). With information on the occurrence of the first COVID-19 case, the cruise ship was quarantined on its arrival at Yokohama on Feb. 3<sup>rd</sup>, 2020. Among the 31 passengers test for SARS-CoV-2 on Feb. 5<sup>th</sup>, 2020, 10 positive results were reported by the Ministry of Health, Labor and Welfare, Japan. The updated information on the number of test performed and positive cases were announced on the website of Ministry of Health, Labor and Welfare, Japan since Feb. 5<sup>th</sup> on daily basis (Wikipedia, 2020a). The number of asymptomatic passengers with positive tests was reported since Feb. 15<sup>th</sup>, 2020. **S-Table 1** in the Supplementary material lists the reported count retrieved from the web-based situation report from the Ministry of Health, Labor and Welfare, Japan (2020) with the numbers cross-checked with reports and line list summarized in medias and the Princess Cruise website (WHO, 2020; Princess Cruise Lines, 2020; Wikipedia, 2020a).

The quarantine procedures implemented in the Diamond Princess cruise ship including the isolation of passengers and crews in cabins and the surveillance for fever and respiratory symptoms that provide the rationale for testing SARS-CoV-2 infection (NIID, 2020a). Passengers were required to stay in their cabinet to

reduce the contacts and social activities during the period of quarantine. However, the strict quarantine procedures were difficult to be realized thoroughly in the cruise ship with the maintenance of operation such as dining and services provided by crews (NIID, 2020a; NIID, 2020b; Princess Cruise Lines, 2020). With the expansion in the capacity for testing SARS-CoV-2, the Diamond Princess cruise ship passengers and crews were tested systematically since Feb. 14<sup>th</sup>. The enhanced measures for isolation policy in the contemporaneous period were also started. A 14-day quarantine period (Feb. 5<sup>th</sup> to Feb. 19<sup>th</sup>) was predetermined by the Ministry of Health, Labor and Welfare, Japan in the light of when passengers and crews free of symptoms and contact with confirmed cases were dismissed from the quarantine status (Ministry of Health, Labor and Welfare, Japan, 2020).

## B. Supplementary Tables

**S-Table 1. Cases of COVID-19, number of subjects tested and number of asymptomatic cases associated with the Diamond Princess Cruise Ship.**

| Date   | Subjects Tested, JP | Total Cases, JP | Total Cases Outside JP | Asymptomatic Cases, JP | Positive rate, JP | Asymptomatic Proportion, JP |
|--------|---------------------|-----------------|------------------------|------------------------|-------------------|-----------------------------|
| Jan-20 | 0                   | 1               | -                      | -                      | -                 | -                           |
| Jan-21 | 0                   | 0               | -                      | -                      | -                 | -                           |
| Jan-22 | 0                   | 0               | -                      | -                      | -                 | -                           |
| Jan-23 | 0                   | 0               | -                      | -                      | -                 | -                           |
| Jan-24 | 0                   | 0               | -                      | -                      | -                 | -                           |
| Jan-25 | 0                   | 0               | -                      | -                      | -                 | -                           |
| Jan-26 | 0                   | 0               | -                      | -                      | -                 | -                           |
| Jan-27 | 0                   | 0               | -                      | -                      | -                 | -                           |
| Jan-28 | 0                   | 0               | -                      | -                      | -                 | -                           |
| Jan-29 | 0                   | 0               | -                      | -                      | -                 | -                           |
| Jan-30 | 0                   | 0               | -                      | -                      | -                 | -                           |
| Jan-31 | 0                   | 0               | -                      | -                      | -                 | -                           |
| Feb-1  | 0                   | 0               | -                      | -                      | -                 | -                           |
| Feb-2  | 0                   | 0               | -                      | -                      | -                 | -                           |
| Feb-3  | 0                   | 0               | -                      | -                      | -                 | -                           |
| Feb-4  | 0                   | 0               | -                      | -                      | -                 | -                           |
| Feb-5  | 31                  | 10              | -                      | -                      | 32.3              | -                           |
| Feb-6  | 71                  | 10              | -                      | -                      | 14.1              | -                           |
| Feb-7  | 171                 | 41              | -                      | -                      | 24.0              | -                           |
| Feb-8  | 6                   | 3               | -                      | -                      | 50.0              | -                           |
| Feb-9  | 57                  | 6               | -                      | -                      | 10.5              | -                           |
| Feb-10 | 103                 | 65              | -                      | -                      | 63.1              | -                           |
| Feb-11 | 0                   | 0               | -                      | -                      | -                 | -                           |
| Feb-12 | 53                  | 39              | -                      | -                      | 73.6              | -                           |
| Feb-13 | 221                 | 44              | -                      | -                      | 19.9              | -                           |
| Feb-14 | 0                   | 0               | -                      | -                      | -                 | -                           |
| Feb-15 | 217                 | 67              | -                      | 73*                    | 30.9              | 25.6                        |
| Feb-16 | 289                 | 70              | -                      | 38                     | 24.2              | 54.3                        |
| Feb-17 | 504                 | 99              | -                      | 78                     | 19.6              | 78.8                        |
| Feb-18 | 681                 | 88              | 14 (USA)               | 65                     | 12.9              | 73.9                        |
| Feb-19 | 607                 | 79              | 0                      | 68                     | 13.0              | 86.1                        |
| Feb-20 | -                   | 13              | 0                      | -                      | -                 | -                           |
| Feb-21 | -                   | 0               | 2 (AU)                 | -                      | -                 | -                           |
| Feb-22 | -                   | 0               | 4 (AU)<br>4 (USA)      | -                      | -                 | -                           |

| <b>Date</b>    | <b>Subjects Tested, JP</b> | <b>Total Cases , JP</b> | <b>Total Cases Outside JP</b> | <b>Asymptomatic Cases, JP</b> | <b>Positive rate, JP</b> | <b>Asymptomatic Proportion, JP</b> |
|----------------|----------------------------|-------------------------|-------------------------------|-------------------------------|--------------------------|------------------------------------|
| <b>Feb-23</b>  | -                          | 57                      | 1 (AU)                        | -                             | -                        | -                                  |
| <b>Feb-24</b>  | -                          | 0                       | 1 (IS)                        | -                             | -                        | -                                  |
| <b>Feb-25</b>  | -                          | 0                       | 4 (UK)                        | -                             | -                        | -                                  |
| <b>Feb-26</b>  | -                          | 14                      | 18                            | -                             | -                        | -                                  |
| <b>Feb-27</b>  | -                          | 0                       | (USA)                         | -                             | -                        | -                                  |
| <b>Feb-28</b>  | -                          | 0                       | 0                             | -                             | -                        | -                                  |
| <b>Feb-29</b>  | -                          | 1                       | 0                             | -                             | -                        | -                                  |
| <b>Overall</b> | <b>3011</b>                | <b>707</b>              | <b>55</b>                     | <b>322</b>                    | <b>20.6</b>              | <b>51.9</b>                        |

Abbreviations: AU: Australia, HK: Hong Kong, IS: Israel, JP: Japan, UK: United Kingdom, USA: United States of America; JP represents the procedures/cases reported in Japan

\*Asymptomatic cases identified between Feb. 5<sup>th</sup> to Feb. 25<sup>th</sup>, 2020.

**S-Table 2. The predicted number of COVID-19 cases of Diamond Princess Cruise Ship passengers up to Mar. 7<sup>th</sup>, 2020 based on estimated results derived from data up to Feb. 19<sup>th</sup>, 2020 with the scenario of persistent transmission.**

| Date   | Observed Cases | Predicted Cases |                       |        |
|--------|----------------|-----------------|-----------------------|--------|
|        |                | Estimate        | 95% Credible Interval |        |
| Feb-5  | 10             | 36.1            | 33.0                  | 39.5   |
| Feb-6  | 20             | 44.9            | 40.7                  | 49.0   |
| Feb-7  | 61             | 55.8            | 50.5                  | 61.2   |
| Feb-8  | 64             | 69.3            | 62.2                  | 76.0   |
| Feb-9  | 70             | 85.9            | 77.2                  | 94.8   |
| Feb-10 | 135            | 106.4           | 95.6                  | 118.1  |
| Feb-11 | 135            | 131.6           | 116.8                 | 145.7  |
| Feb-12 | 174            | 162.4           | 144.1                 | 180.6  |
| Feb-13 | 218            | 199.8           | 176.2                 | 222.4  |
| Feb-14 | 218            | 245.2           | 216.2                 | 274.2  |
| Feb-15 | 285            | 299.9           | 261.4                 | 333.8  |
| Feb-16 | 355            | 365.2           | 318.9                 | 408.1  |
| Feb-17 | 454            | 442.6           | 386.2                 | 495.1  |
| Feb-18 | 556            | 533.2           | 464.8                 | 596.9  |
| Feb-19 | 635            | 638.1           | 557.5                 | 715.0  |
| Feb-20 | 648            | 757.9           | 664.9                 | 850.0  |
| Feb-21 | 650            | 892.5           | 782.8                 | 996.1  |
| Feb-22 | 658            | 1041.1          | 916.8                 | 1159.2 |
| Feb-23 | 717            | 1202.1          | 1069.2                | 1337.9 |
| Feb-24 | 721            | 1373.2          | 1222.3                | 1515.6 |
| Feb-25 | 739            | 1551.3          | 1389.4                | 1702.1 |
| Feb-26 | 753            | 1732.8          | 1567.3                | 1895.3 |
| Feb-27 | 753            | 1914.2          | 1744.9                | 2083.0 |
| Feb-28 | 760            | 2091.7          | 1918.8                | 2260.9 |
| Feb-29 | 761            | 2262.4          | 2088.4                | 2431.1 |
| Mar-1  | -              | 2423.7          | 2251.1                | 2589.2 |
| Mar-2  | -              | 2573.7          | 2406.3                | 2736.2 |
| Mar-3  | -              | 2711.3          | 2542.4                | 2859.4 |
| Mar-4  | -              | 2836.0          | 2678.0                | 2979.6 |
| Mar-5  | -              | 2948.0          | 2804.8                | 3092.8 |
| Mar-6  | -              | 3047.5          | 2901.2                | 3174.7 |
| Mar-7  | -              | 3135.2          | 3001.2                | 3257.8 |

**S-Table 3. Natural evolution of the compartment of susceptible (S), exposed (E), infectious (I), and removed (R) predicted by Bayesian ODE SEIR model using data on COVID-19 outbreak on the Diamond Princess Cruise Ship up to Feb. 19<sup>th</sup>, 2020.**

| Date          | Susceptible |                       |        | Exposed  |                       |       | Infectious |                       |       | Removed  |                       |       |
|---------------|-------------|-----------------------|--------|----------|-----------------------|-------|------------|-----------------------|-------|----------|-----------------------|-------|
|               | Estimate    | 95% Credible Interval |        | Estimate | 95% Credible Interval |       | Estimate   | 95% Credible Interval |       | Estimate | 95% Credible Interval |       |
| <b>Jan-20</b> | 3709.3      | 3709.1                | 3709.4 | 0.7      | 0.6                   | 0.8   | 0.9        | 0.9                   | 1.0   | 0.1      | 0.1                   | 0.2   |
| <b>Jan-21</b> | 3708.5      | 3708.2                | 3708.8 | 1.3      | 1.0                   | 1.6   | 1.0        | 0.9                   | 1.1   | 0.3      | 0.2                   | 0.4   |
| <b>Jan-22</b> | 3707.7      | 3707.3                | 3708.0 | 1.8      | 1.4                   | 2.2   | 1.1        | 1.0                   | 1.2   | 0.4      | 0.3                   | 0.6   |
| <b>Jan-23</b> | 3706.7      | 3706.2                | 3707.2 | 2.4      | 1.8                   | 2.9   | 1.3        | 1.2                   | 1.5   | 0.6      | 0.4                   | 0.8   |
| <b>Jan-24</b> | 3705.6      | 3704.9                | 3706.2 | 3.0      | 2.3                   | 3.7   | 1.6        | 1.5                   | 1.8   | 0.8      | 0.5                   | 1.1   |
| <b>Jan-25</b> | 3704.1      | 3703.3                | 3705.0 | 3.8      | 2.9                   | 4.7   | 2.0        | 1.8                   | 2.2   | 1.1      | 0.7                   | 1.4   |
| <b>Jan-26</b> | 3702.4      | 3701.3                | 3703.5 | 4.8      | 3.7                   | 5.9   | 2.5        | 2.2                   | 2.7   | 1.4      | 0.9                   | 1.8   |
| <b>Jan-27</b> | 3700.2      | 3698.8                | 3701.5 | 5.9      | 4.6                   | 7.4   | 3.1        | 2.8                   | 3.4   | 1.8      | 1.2                   | 2.3   |
| <b>Jan-28</b> | 3697.5      | 3695.7                | 3699.3 | 7.4      | 5.7                   | 9.3   | 3.8        | 3.4                   | 4.3   | 2.3      | 1.5                   | 2.9   |
| <b>Jan-29</b> | 3694.1      | 3691.9                | 3696.4 | 9.2      | 7.1                   | 11.5  | 4.8        | 4.2                   | 5.3   | 2.9      | 2.0                   | 3.7   |
| <b>Jan-30</b> | 3689.9      | 3686.9                | 3692.7 | 11.5     | 8.7                   | 14.4  | 6.0        | 5.2                   | 6.7   | 3.6      | 2.5                   | 4.7   |
| <b>Jan-31</b> | 3684.7      | 3680.9                | 3688.3 | 14.3     | 10.9                  | 18.0  | 7.4        | 6.5                   | 8.3   | 4.6      | 3.1                   | 5.9   |
| <b>Feb-1</b>  | 3678.3      | 3673.4                | 3682.8 | 17.8     | 13.5                  | 22.5  | 9.2        | 8.1                   | 10.5  | 5.7      | 3.9                   | 7.4   |
| <b>Feb-2</b>  | 3670.2      | 3664.1                | 3676.1 | 22.1     | 16.5                  | 27.8  | 11.5       | 10.1                  | 13.1  | 7.2      | 5.0                   | 9.3   |
| <b>Feb-3</b>  | 3660.2      | 3651.8                | 3667.1 | 27.5     | 20.4                  | 34.6  | 14.3       | 12.4                  | 16.4  | 9.0      | 6.3                   | 11.6  |
| <b>Feb-4</b>  | 3647.8      | 3637.2                | 3656.7 | 34.2     | 25.3                  | 43.2  | 17.8       | 15.4                  | 20.5  | 11.2     | 7.9                   | 14.6  |
| <b>Feb-5</b>  | 3632.5      | 3619.3                | 3644.0 | 42.4     | 31.3                  | 53.8  | 22.1       | 19.0                  | 25.6  | 14.0     | 9.9                   | 18.2  |
| <b>Feb-6</b>  | 3613.6      | 3597.2                | 3628.5 | 52.6     | 38.5                  | 66.6  | 27.4       | 23.4                  | 31.9  | 17.5     | 12.5                  | 22.7  |
| <b>Feb-7</b>  | 3590.2      | 3569.4                | 3609.1 | 65.0     | 47.6                  | 82.9  | 34.0       | 28.8                  | 39.7  | 21.8     | 15.6                  | 28.3  |
| <b>Feb-8</b>  | 3561.4      | 3535.1                | 3585.5 | 80.4     | 58.1                  | 102.2 | 42.2       | 35.4                  | 49.4  | 27.1     | 19.3                  | 35.1  |
| <b>Feb-9</b>  | 3526.0      | 3494.3                | 3557.7 | 99.1     | 71.3                  | 126.3 | 52.2       | 43.7                  | 61.5  | 33.8     | 24.1                  | 43.7  |
| <b>Feb-10</b> | 3482.7      | 3443.4                | 3522.9 | 121.8    | 88.4                  | 156.7 | 64.5       | 53.7                  | 76.5  | 41.9     | 30.1                  | 54.3  |
| <b>Feb-11</b> | 3430.1      | 3381.0                | 3480.8 | 149.3    | 110.8                 | 195.1 | 79.6       | 65.8                  | 94.8  | 52.0     | 38.0                  | 67.9  |
| <b>Feb-12</b> | 3366.3      | 3305.0                | 3429.0 | 182.3    | 135.1                 | 238.6 | 97.9       | 80.5                  | 117.3 | 64.4     | 46.9                  | 83.7  |
| <b>Feb-13</b> | 3289.6      | 3213.2                | 3366.2 | 221.5    | 163.8                 | 290.3 | 120.1      | 98.0                  | 144.4 | 79.7     | 58.0                  | 103.2 |
| <b>Feb-14</b> | 3198.1      | 3104.0                | 3292.1 | 267.7    | 192.4                 | 345.8 | 146.9      | 119.2                 | 177.3 | 98.4     | 71.5                  | 126.9 |
| <b>Feb-15</b> | 3090.0      | 2967.3                | 3195.1 | 321.1    | 236.9                 | 420.8 | 178.8      | 144.1                 | 216.8 | 121.2    | 89.0                  | 156.9 |

| Date   | Susceptible |                       |        | Exposed  |                       |        | Infectious |                       |        | Removed  |                       |        |
|--------|-------------|-----------------------|--------|----------|-----------------------|--------|------------|-----------------------|--------|----------|-----------------------|--------|
|        | Estimate    | 95% Credible Interval |        | Estimate | 95% Credible Interval |        | Estimate   | 95% Credible Interval |        | Estimate | 95% Credible Interval |        |
| Feb-16 | 2963.7      | 2821.3                | 3093.1 | 382.1    | 272.6                 | 490.4  | 216.5      | 173.0                 | 263.1  | 148.8    | 109.6                 | 192.3  |
| Feb-17 | 2818.2      | 2652.1                | 2971.1 | 450.2    | 329.5                 | 584.1  | 260.5      | 207.3                 | 318.3  | 182.1    | 134.4                 | 234.5  |
| Feb-18 | 2653.3      | 2459.4                | 2830.2 | 524.5    | 387.1                 | 680.1  | 311.2      | 244.7                 | 379.8  | 222.1    | 164.2                 | 284.9  |
| Feb-19 | 2469.9      | 2250.9                | 2672.8 | 603.0    | 443.1                 | 774.8  | 368.6      | 289.4                 | 452.6  | 269.6    | 199.5                 | 344.1  |
| Feb-20 | 2270.1      | 2034.8                | 2506.5 | 683.0    | 502.8                 | 870.8  | 432.4      | 340.8                 | 536.0  | 325.5    | 241.7                 | 413.4  |
| Feb-21 | 2057.6      | 1791.9                | 2306.2 | 760.9    | 566.6                 | 965.1  | 501.8      | 395.9                 | 626.7  | 390.7    | 291.6                 | 493.8  |
| Feb-22 | 1837.5      | 1563.6                | 2109.4 | 832.5    | 625.1                 | 1047.6 | 575.2      | 440.0                 | 708.3  | 465.9    | 350.5                 | 586.5  |
| Feb-23 | 1615.7      | 1334.7                | 1899.9 | 893.2    | 670.6                 | 1108.7 | 650.8      | 497.6                 | 806.3  | 551.3    | 414.2                 | 686.9  |
| Feb-24 | 1398.7      | 1125.3                | 1694.0 | 939.2    | 711.4                 | 1155.5 | 725.9      | 554.1                 | 905.7  | 647.3    | 489.7                 | 800.9  |
| Feb-25 | 1192.6      | 927.4                 | 1485.8 | 967.2    | 755.7                 | 1197.6 | 797.9      | 610.7                 | 1007.8 | 753.4    | 573.7                 | 925.1  |
| Feb-26 | 1002.6      | 744.3                 | 1281.5 | 975.6    | 769.8                 | 1199.8 | 863.8      | 660.5                 | 1102.0 | 869.0    | 676.7                 | 1068.6 |
| Feb-27 | 832.4       | 587.1                 | 1089.1 | 964.5    | 760.9                 | 1177.6 | 921.1      | 690.6                 | 1174.6 | 993.1    | 780.5                 | 1210.8 |
| Feb-28 | 683.9       | 466.1                 | 926.3  | 935.4    | 735.0                 | 1134.5 | 967.5      | 716.7                 | 1242.0 | 1124.3   | 890.6                 | 1357.3 |
| Feb-29 | 557.5       | 354.5                 | 769.7  | 891.1    | 695.6                 | 1080.1 | 1001.6     | 727.3                 | 1290.7 | 1260.8   | 1007.2                | 1509.7 |
| Mar-1  | 452.1       | 274.6                 | 646.7  | 835.3    | 659.2                 | 1028.4 | 1022.6     | 719.9                 | 1319.1 | 1401.0   | 1127.2                | 1662.1 |
| Mar-2  | 365.7       | 205.7                 | 534.3  | 771.6    | 609.4                 | 959.6  | 1030.6     | 724.2                 | 1353.4 | 1543.1   | 1254.0                | 1816.4 |
| Mar-3  | 296.0       | 150.9                 | 439.9  | 703.7    | 547.8                 | 881.5  | 1026.2     | 691.4                 | 1346.8 | 1685.1   | 1381.2                | 1967.6 |
| Mar-4  | 240.2       | 116.6                 | 369.9  | 634.8    | 484.7                 | 800.9  | 1010.5     | 676.3                 | 1351.2 | 1825.5   | 1509.5                | 2115.6 |
| Mar-5  | 195.9       | 86.9                  | 308.8  | 567.1    | 424.0                 | 721.5  | 985.1      | 648.7                 | 1334.9 | 1962.9   | 1655.3                | 2273.8 |
| Mar-6  | 161.0       | 67.7                  | 262.5  | 502.6    | 368.4                 | 649.7  | 951.5      | 613.3                 | 1304.7 | 2096.0   | 1788.8                | 2413.5 |
| Mar-7  | 133.4       | 52.8                  | 224.7  | 442.4    | 320.0                 | 583.0  | 911.5      | 578.5                 | 1271.8 | 2223.7   | 1906.6                | 2533.2 |



**S-Table 4. The predicted number of cumulative COVID-19 cases on the Diamond Princess Cruise Ship based on the scenario of complete containment measures applied on Feb. 14<sup>th</sup>, 2020.**

| <b>Date</b>   | <b>Observed Cases</b> | <b>Predicted Cases</b> |                     |       |
|---------------|-----------------------|------------------------|---------------------|-------|
|               |                       | <b>Estimate</b>        | <b>95% Credible</b> |       |
| <b>Feb-5</b>  | 10                    | 36.1                   | 32.8                | 39.4  |
| <b>Feb-6</b>  | 20                    | 45.0                   | 40.8                | 49.2  |
| <b>Feb-7</b>  | 61                    | 55.9                   | 50.6                | 61.5  |
| <b>Feb-8</b>  | 64                    | 69.4                   | 62.2                | 76.1  |
| <b>Feb-9</b>  | 70                    | 86.1                   | 77.1                | 94.9  |
| <b>Feb-10</b> | 135                   | 106.7                  | 94.6                | 117.4 |
| <b>Feb-11</b> | 135                   | 131.9                  | 116.5               | 145.7 |
| <b>Feb-12</b> | 174                   | 162.8                  | 143.1               | 180.2 |
| <b>Feb-13</b> | 218                   | 200.4                  | 176.7               | 223.5 |
| <b>Feb-14</b> | 218                   | 238.1                  | 210.4               | 267.0 |
| <b>Feb-15</b> | 285                   | 269.3                  | 237.3               | 302.4 |
| <b>Feb-16</b> | 355                   | 295.2                  | 261.3               | 333.7 |
| <b>Feb-17</b> | 454                   | 316.6                  | 274.8               | 354.0 |
| <b>Feb-18</b> | 556                   | 334.3                  | 290.7               | 376.4 |
| <b>Feb-19</b> | 635                   | 349.1                  | 302.5               | 394.2 |
| <b>Feb-20</b> | 648                   | 361.3                  | 312.0               | 409.9 |
| <b>Feb-21</b> | 650                   | 371.5                  | 320.3               | 424.1 |
| <b>Feb-22</b> | 658                   | 379.9                  | 327.0               | 435.9 |
| <b>Feb-23</b> | 717                   | 387.0                  | 332.9               | 447.1 |
| <b>Feb-24</b> | 721                   | 392.8                  | 336.1               | 454.9 |
| <b>Feb-25</b> | 739                   | 397.7                  | 340.1               | 463.4 |
| <b>Feb-26</b> | 753                   | 401.8                  | 342.0               | 469.3 |
| <b>Feb-27</b> | 753                   | 405.2                  | 344.0               | 474.7 |
| <b>Feb-28</b> | 760                   | 408.0                  | 345.4               | 479.4 |
| <b>Feb-29</b> | 761                   | 410.4                  | 346.7               | 483.6 |
